# Supplementary material
Source: publisher figshare collection journal article supplement (https://gsapubs.figshare.com/ndownloader/files/22747004)

# LAACHER SEE REVISITED: HIGH SPATIAL RESOLUTION ZIRCON DATING IMPLIES RAPID FORMATION OF A ZONED MAGMA CHAMBER - DATA REPOSITORY

## ANALYTICAL PROCEDURES

### *Ion microprobe U-Th measurements*

Th-U dating was performed on individual zircons using the UCLA Cameca ims 1270 secondary ion mass spectrometer (SIMS, ion microprobe), modifying a technique from Reid et al. (1997). A mass-filtered  $^{16}\text{O}^-$  beam was focused into a  $\sim 35 \times 30 \mu\text{m}$  oval spot. Primary beam intensity was regulated to a current between 20 and 40 nA, in order to achieve  $^{232}\text{ThO}^+$  count rates  $>10^6$  cps. Secondary ions were accelerated at 10 keV with an energy bandpass of 50 eV and analyzed at a mass resolution of  $M/\Delta M \sim 4,800$  using an axial electron multiplier collector in peak jumping mode. Th/U relative sensitivity was calibrated from  $^{238}\text{UO}^+/^{232}\text{ThO}^+$  and radiogenic  $^{206}\text{Pb}/^{208}\text{Pb}$  measurements of concordant reference zircons AS3 and 91500 (Paces and Miller, 1993; Wiedenbeck et al., 1995): session 1 (June 07 2005):  $1.12 \pm 0.01$ ; session 2 (June 15 2005):  $1.09 \pm 0.02$ ; session 3 (September 21-22 2005):  $1.11 \pm 0.03$ . Raw intensities were corrected for electron multiplied dead-time (25 nsec), and background corrections on  $^{230}\text{ThO}^+$  were performed using the averaged intensities measured on two mass stations at 244.029 and 246.3 amu. Mass 244.029 ( $^{232}\text{ThC}^+$ ) is also monitored as a proxy for  $^{232}\text{Th}_2\text{CO}^{2+}$  isobaric interference (resulting from epoxy overlap) on  $^{230}\text{ThO}^+$ , but no elevated 244.029 intensities were found. Throughout analytical sessions, reference zircons were intermittently analyzed along with the unknowns and the following  $(^{230}\text{Th})/(^{238}\text{U})$  values were obtained: session 1:  $0.991 \pm 0.056$  ( $n = 1$ ); session 2:  $0.994 \pm 0.028$  (MSWD = 1.2,  $n = 2$ ); session 3:  $1.010 \pm 0.016$  (MSWD = 0.51;  $n = 11$ ). U and Th abundances were calculated relative to  $^{238}\text{UO}^+/^{92}\text{Zr}^{94}\text{ZrO}_4^+$  measured on zircon 91500 with a U content of 81.2 ppm (Wiedenbeck et al., 1994).

### *Ion microprobe U-Pb measurements*

U-Pb ages were obtained using the UCLA CAMECA ims 1270 ion probe. Samples that had been coated with  $\sim 10$  nm of Au were probed with a mass-filtered,  $\sim 10$  nA  $^{16}\text{O}^-$  beam focused to a  $\sim 20 \times 25 \mu\text{m}$  diameter spot. Secondary ions were extracted at 10 kV with an energy band-pass of 50 eV. The mass spectrometer was tuned to a mass resolution of  $M/\Delta M \sim 5,000$  to resolve relevant molecular interferences in the mass range analyzed ( $^{94}\text{Zr}_2\text{O}^+$ ,  $^{204}\text{Pb}^+$ ,  $^{206}\text{Pb}^+$ ,  $^{207}\text{Pb}^+$ ,  $^{208}\text{Pb}^+$ ,  $^{238}\text{U}^+$ ,  $^{232}\text{Th}^{16}\text{O}^+$ ,  $^{238}\text{U}^{16}\text{O}^+$ ).  $\text{Pb}^+$  yields were increased by a factor of  $\sim 2$  by flooding the analysis surface with  $\text{O}_2$  at a pressure of  $\sim 4 \times 10^{-3}$  Pa. The relative sensitivities for Pb and U were determined on reference zircon AS3 (Paces and Miller, 1993). Precision and accuracy of U-Pb ages is estimated from standard

deviations of replicate zircon standard measurements and comparison with 91500 zircon ages to within 2 - 3 % ( $1\sigma$ ). Th and U contents were calculated from  $^{232}\text{Th}^{16}\text{O}^+ / ^{94}\text{Zr}_2\text{O}^+$  and  $^{238}\text{U}^{16}\text{O}^+ / ^{94}\text{Zr}_2\text{O}^+$  ratios, respectively, compared to reference zircon 91500 (Th = 28.6 ppm; U = 81.2 ppm; Wiedenbeck et al., 1995). Ages were calculated following a  $^{204}\text{Pb}$ -based common-Pb correction using anthropogenic Pb compositions (Sañudo-Wilhelmy and Flegal, 1994).

#### *Ion microprobe oxygen isotopic measurements*

Oxygen isotope measurements were made with the CAMECA ims1270 ion microprobe at UCLA. Two mounts were analyzed in subsequent sessions on August 24 (session 1) and August 25 2005 (session 2) after completion of U-Th analysis and regrinding and repolishing that removed several  $\mu\text{m}$  of the surface contaminated from previous  $^{16}\text{O}^-$  ion beam bombardment. A  $\sim 15 \times 20 \mu\text{m}$  oval  $\text{Cs}^+$  primary beam with a primary intensity of  $\sim 3 \text{ nA}$  was used. Secondary ion intensities for  $^{16}\text{O}^-$  and  $^{18}\text{O}^-$  were simultaneously collected in two Faraday cups (FC) set-up for a mass resolving power of  $\sim 2000$ , sufficient for resolving hydride interferences from the  $^{18}\text{O}^-$  peak. In addition, a liquid nitrogen cold trap was used to suppress H-species in the vacuum of the sample chamber. Following a  $\sim 3 \text{ min}$  pre-sputtering to remove potentially contaminated surface material, counts were accumulated for 100 seconds. Under these conditions,  $\sim 3.5 \times 10^6 \text{ cps}$  were typically detected for the minor isotope. Raw intensities were corrected for FC relative yields and backgrounds, which were monitored intermittently throughout the analysis period. Background corrections amount to typically  $< 0.4\%$ . Instrumental mass fractionation (IMF) was calibrated from bracketing measurements of 91500 zircon ( $\delta^{18}\text{O} = 10.1$ ; Valley, 2003) where  $\text{IMF} = 1.007 \pm 0.005$  (session 1; 1 standard deviation;  $n = 5$ ) and  $1.007 \pm 0.003$  (session 2;  $n = 10$ ). Since no drift or difference in IMF was found between both sessions, the average IMF was used for the correction of unknowns, and the standard deviation of all 91500 measurements ( $0.4 \text{ ‰}$ ;  $n = 15$ ) was adopted as an estimate for the uncertainty of  $\delta^{18}\text{O}$  of the unknowns.

#### *Ion microprobe rare earth element (REE) measurements*

REE measurements were performed using the CAMECA ims1270 ion microprobe at UCLA with a mass-filtered  $\sim 20 \text{ nA}$   $^{16}\text{O}^-$  beam (October 28 2005). Sample mounts were slightly reground and repolished to remove Cs spots from previous oxygen isotopic analysis. The instrument was operated at moderate mass resolution ( $\sim 1500$ ) using a 100 eV energy offset with a 30 eV bandpass. REE intensities were normalized to  $^{30}\text{Si}^+$  and corrected for electron multiplier dead-time (25 nsec) and interfering oxides. Relative sensitivities were calculated from NBS 610 glass using Pearce et al. (1995) values. For assessing accuracy and precision, averages and standard deviations of three replicate measurements of zircon 91500 are reported.

#### REFERENCES

Paces, J.B., and Miller, J.D., 1993, Precise U-Pb ages of Duluth Complex and related mafic intrusions, northeastern Minnesota; geochronological insights to physical, petrogenetic, paleomagnetic, and tectonomagnetic processes associated with the 1.1 Ga Midcontinent Rift System: *Journal of Geophysical Research*, v. 98, p. 13997-14013.

- Pearce, N.J.G., Perkins, W.T., Westgate, J.A., Gorton, M.P., Jackson, S.E., Neal, C.R., and Chenery, S.P., 1995, A compilation of new and published major and trace element data for NIST SRM 610 and NIST SRM 612 glass reference materials: *Geostandards Newsletter*, v. 21, p. 115-144.
- Sañudo-Wilhelmy, S.A., and Flegal, A.R., 1994, Temporal variations in lead concentrations and isotopic composition in the Southern California Bight: *Geochimica et Cosmochimica Acta*, v. 58, p. 3315-3320.
- Valley, J.W., 2003, Oxygen isotopes in zircon, in Hanchar, J.M., and Hoskin, P.W.O, eds., *Zircon: Reviews in Mineralogy and Geochemistry*, v. 53, p. 343-385.
- Wiedenbeck, M., Alle, P., Corfu, F., Griffin, W.L., Meier, M., Oberli, F., Von, Q.A., Roddick, J.C., and Spiegel, W., 1995, Three natural zircon standards for U-Th-Pb, Lu-Hf, trace element and REE analyses: *Geostandards Newsletter*, v. 19, p. 1-23.

Table DR 1: U-Pb results for Laacher See zircons by ion microprobe analysis

| Sample                           | $^{206}\text{Pb}/^{238}\text{U}^*$ | $^{207}\text{Pb}/^{235}\text{U}^*$ | Correlation | $^{207}\text{Pb}/^{206}\text{Pb}^*$ | $^{204}\text{Pb}/^{206}\text{Pb}$ | $^{206}\text{Pb}$<br>(% radiogenic) | $^{206}\text{Pb}/^{238}\text{U}$<br>(Ma) | $^{207}\text{Pb}/^{235}\text{U}$<br>(Ma) | $^{207}\text{Pb}/^{206}\text{Pb}$<br>(Ma) | Concentration |          |
|----------------------------------|------------------------------------|------------------------------------|-------------|-------------------------------------|-----------------------------------|-------------------------------------|------------------------------------------|------------------------------------------|-------------------------------------------|---------------|----------|
| grain-spot                       |                                    |                                    |             |                                     |                                   |                                     |                                          |                                          |                                           | U (ppm)       | Th (ppm) |
| <u>LS0501 - composite pumice</u> |                                    |                                    |             |                                     |                                   |                                     |                                          |                                          |                                           |               |          |
| 3 - 1                            | 0.212 ± 0.012                      | 2.54 ± 0.15                        | 0.94        | 0.0869 ± 0.0019                     | 0.000291 ± 0.000093               | 99.5                                | 1241 ± 63                                | 1284 ± 44                                | 1357 ± 41                                 | 90            | 40       |
| 4 - 1                            | 0.348 ± 0.018                      | 8.68 ± 0.46                        | 0.99        | 0.181 ± 0.001                       | 0.000074 ± 0.000017               | 99.9                                | 1923 ± 86                                | 2305 ± 48                                | 2664 ± 13                                 | 270           | 60       |
| 5 - 1                            | 0.267 ± 0.013                      | 3.68 ± 0.19                        | 0.97        | 0.100 ± 0.001                       | 0.000107 ± 0.000025               | 99.8                                | 1523 ± 66                                | 1567 ± 40                                | 1627 ± 22                                 | 340           | 130      |
| 6 - 1                            | 0.0632 ± 0.0036                    | 0.479 ± 0.030                      | 0.94        | 0.0550 ± 0.0012                     | 0.000293 ± 0.000061               | 99.5                                | 395 ± 22                                 | 398 ± 21                                 | 414 ± 48                                  | 480           | 230      |
| 7 - 1                            | 0.273 ± 0.014                      | 6.01 ± 0.32                        | 0.97        | 0.160 ± 0.002                       | 0.000039 ± 0.000023               | 99.9                                | 1556 ± 72                                | 1977 ± 47                                | 2452 ± 22                                 | 210           | 70       |
| 8 - 1                            | 0.302 ± 0.018                      | 4.19 ± 0.25                        | 0.98        | 0.101 ± 0.001                       | 0.000021 ± 0.000011               | 100.0                               | 1702 ± 87                                | 1673 ± 49                                | 1636 ± 22                                 | 310           | 300      |
| 9 - 1                            | 0.277 ± 0.016                      | 3.88 ± 0.23                        | 0.98        | 0.102 ± 0.001                       | 0.000073 ± 0.000033               | 99.9                                | 1576 ± 79                                | 1609 ± 47                                | 1653 ± 22                                 | 150           | 160      |
| 10 - 1                           | 0.0617 ± 0.0031                    | 0.455 ± 0.025                      | 0.91        | 0.0535 ± 0.0013                     | 0.000312 ± 0.000063               | 99.4                                | 386 ± 19                                 | 381 ± 18                                 | 350 ± 53                                  | 630           | 470      |
| 11 - 1                           | 0.0725 ± 0.0043                    | 0.574 ± 0.038                      | 0.93        | 0.0575 ± 0.0014                     | 0.000221 ± 0.000056               | 99.6                                | 451 ± 26                                 | 461 ± 24                                 | 509 ± 53                                  | 570           | 70       |
| 13 - 1                           | 0.214 ± 0.014                      | 2.27 ± 0.15                        | 0.98        | 0.0770 ± 0.001                      | 0.000101 ± 0.000034               | 99.8                                | 1248 ± 72                                | 1203 ± 45                                | 1122 ± 27                                 | 210           | 100      |
| 14 - 1                           | 0.264 ± 0.014                      | 3.46 ± 0.19                        | 0.97        | 0.0951 ± 0.0013                     | 0.000026 ± 0.000012               | 100.0                               | 1511 ± 69                                | 1518 ± 43                                | 1529 ± 26                                 | 340           | 160      |
| 15 - 1                           | 0.256 ± 0.013                      | 3.37 ± 0.17                        | 0.97        | 0.0955 ± 0.0011                     | 0.000065 ± 0.000023               | 99.9                                | 1471 ± 66                                | 1498 ± 39                                | 1537 ± 22                                 | 260           | 180      |
| 20 - 1                           | 0.306 ± 0.024                      | 3.86 ± 0.33                        | 0.97        | 0.0915 ± 0.0021                     | 0.000067 ± 0.000036               | 99.9                                | 1721 ± 116                               | 1605 ± 70                                | 1457 ± 44                                 | 440           | 140      |
| 21 - 1                           | 0.336 ± 0.026                      | 4.56 ± 0.35                        | 0.97        | 0.0985 ± 0.0019                     | 0.000112 ± 0.000051               | 99.8                                | 1866 ± 125                               | 1742 ± 64                                | 1596 ± 37                                 | 180           | 90       |

Note: All errors 1σ.

Table DR 2: Rare earth element results for Laacher See zircons by ion microprobe analysis

| Sample | LS0501 | LS0501 | LS0501 | LS0501 | LST sn 2 | LST sn 2 | LST sn 3 | LST sn 3 | 91500 <sup>*</sup> |
|--------|--------|--------|--------|--------|----------|----------|----------|----------|--------------------|
| grain  | 1      | 2      | 16     | 17     | 1        | 1        | 1        | 1        | average (n = 3)    |
| spot   | 1      | 1      | 1      | 1      | 1        | 2        | 1        | 2        |                    |
| La     | 0.14   | 29     | 0.27   | 0.05   | 3.2      | 1.2      | 0.66     | 2.4      | 0.028 ± 0.003      |
| Ce     | 162    | 3047   | 415    | 27     | 992      | 1081     | 1107     | 845      | 2.8 ± 0.1          |
| Pr     | 0.7    | 41     | 1.8    | 0.06   | 7.6      | 4.6      | 3.5      | 4.2      | 0.018 ± 0.001      |
| Nd     | 7.4    | 287    | 19     | 0.7    | 67       | 48       | 37       | 41       | 0.20 ± 0.02        |
| Sm     | 6.5    | 148    | 17     | 0.6    | 50       | 49       | 38       | 34       | 0.32 ± 0.03        |
| Eu     | 1.7    | 53     | 4.4    | 0.25   | 18       | 20       | 16       | 13       | 0.18 ± 0.01        |
| Gd     | 15     | 171    | 47     | 1.3    | 142      | 153      | 135      | 91       | 1.7 ± 0.02         |
| Tb     | 10     | 91     | 26     | 1.3    | 53       | 75       | 71       | 46       | 0.75 ± 0.05        |
| Dy     | 127    | 847    | 318    | 17     | 619      | 933      | 919      | 546      | 9.9 ± 0.4          |
| Ho     | 57     | 268    | 140    | 8.3    | 258      | 412      | 417      | 234      | 4.4 ± 0.2          |
| Er     | 286    | 1069   | 690    | 46     | 1258     | 2062     | 2113     | 1146     | 22 ± 0.2           |
| Tm     | 74     | 220    | 171    | 13     | 326      | 551      | 557      | 298      | 6.0 ± 0.04         |
| Yb     | 725    | 1433   | 1612   | 140    | 3226     | 5667     | 5484     | 2938     | 60 ± 0.6           |
| Lu     | 156    | 149    | 335    | 35     | 643      | 1130     | 1092     | 583      | 12.8 ± 0.4         |

Note: all values in ppm

<sup>\*</sup> average and standard deviation of three replicate measurements on 91500 reference zircon

**DR Fig. 1: Backscatter and cathodoluminescence images of Laacher See zircons (ion microprobe U-Th spot locations indicated)**

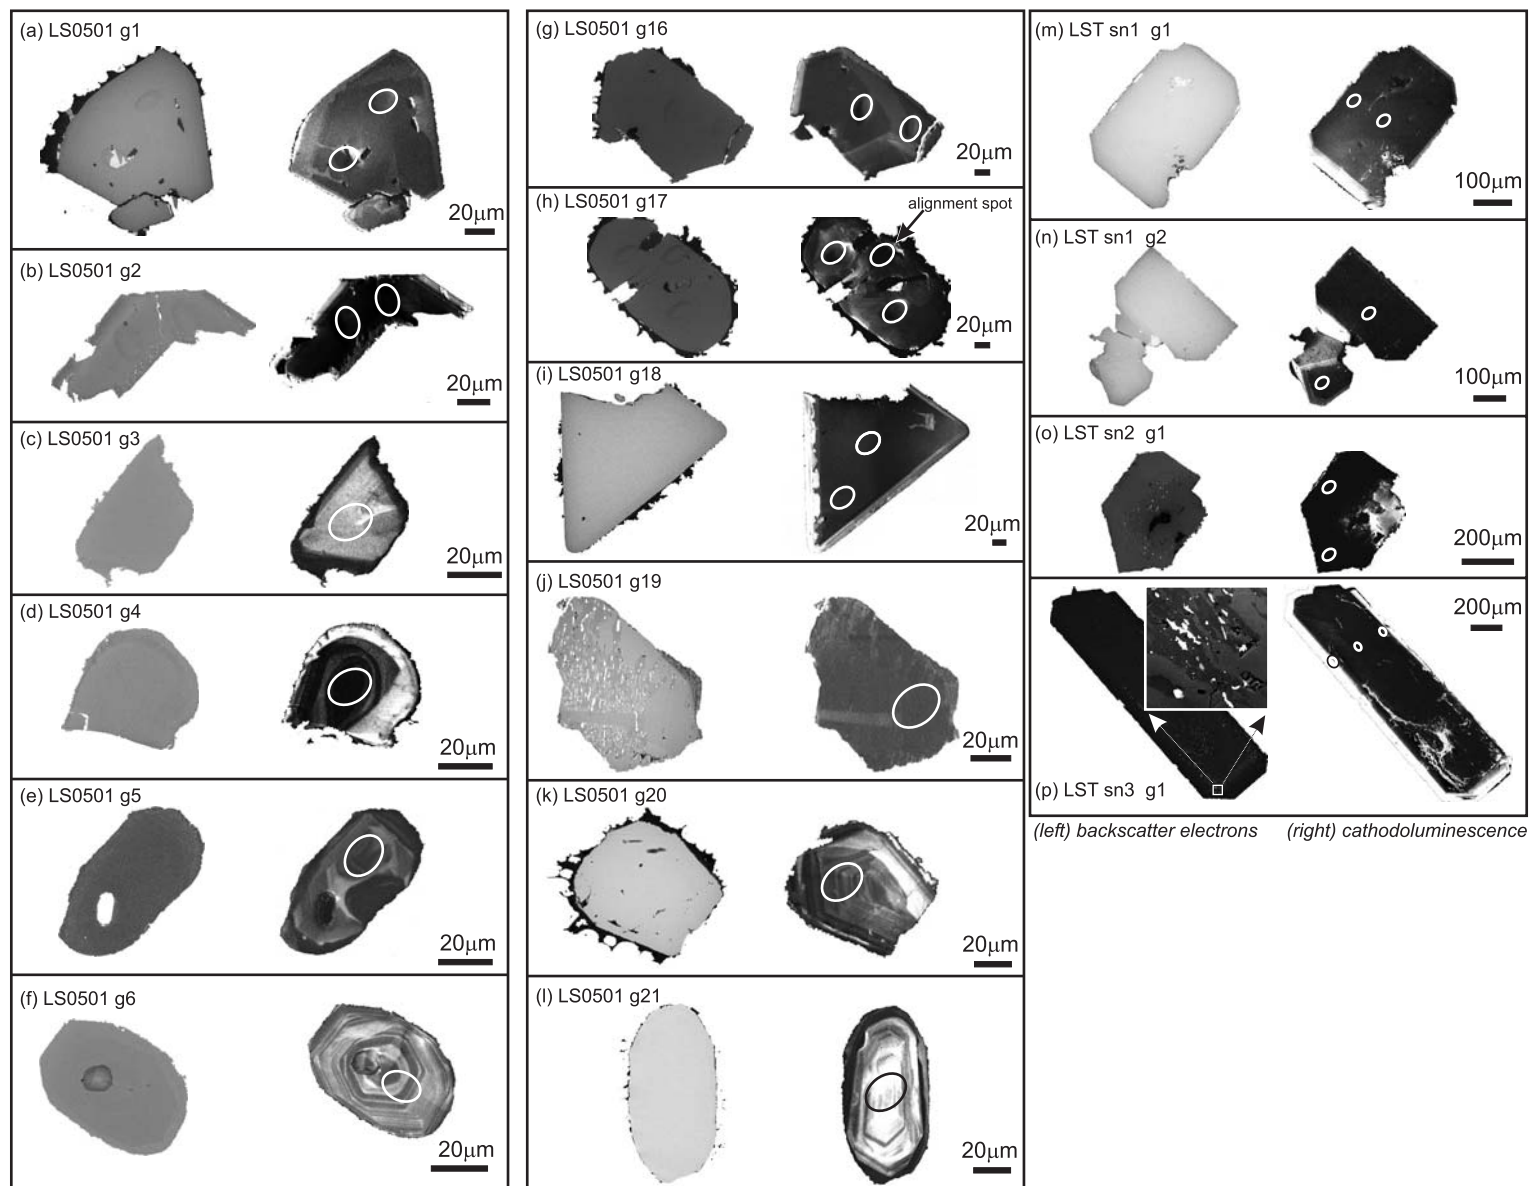

Supplement: Supplementary file 1 [file 22747004]
